# Supplementary material for: In situ controllable construction of Ni@NiO Schottky heterojunctions for electrocatalytic hydrogen evolution
Source: Royal Society of Chemistry journal article supplement (doi:10.1039/d4tc03342f), 2024-01-01
Supplement: d4tc03342f1.pdf [file d4tc03342f1.pdf]

Supplementary information

**In-situ Controllable Construction of Ni@NiO Schottky Heterojunctions for Electrochemical Hydrogen Evolution**

Rui Li, Ziyi Pu, Rongxiu Zhou, Yuanzhi Li, Yexiong Huang, Shuaiqi Li, Jie Yang\*,  
Dingke Zhang\*, Mingyu Pi\*

School of Physics and Electronic Engineering, Chongqing Normal University,  
Chongqing 401331, China

\*Corresponding author: Jie Yang, email: [jieyang611@cqu.edu.cn](mailto:jieyang611@cqu.edu.cn), Dingke Zhang,  
email: [zhangdk@cqu.edu.cn](mailto:zhangdk@cqu.edu.cn), Mingyu Pi, email: [mingyupi@cqu.edu.cn](mailto:mingyupi@cqu.edu.cn)

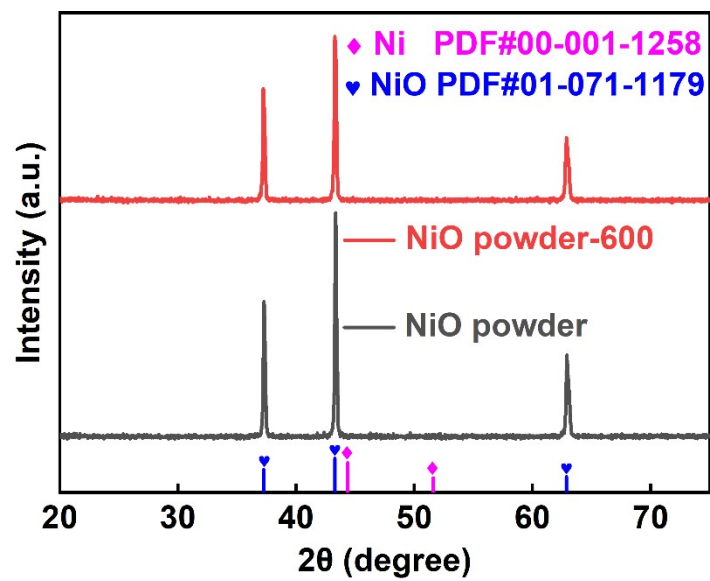

Fig. S1. XRD patterns for NiO powder without CFP before and after vacuum annealing under 600 °C.

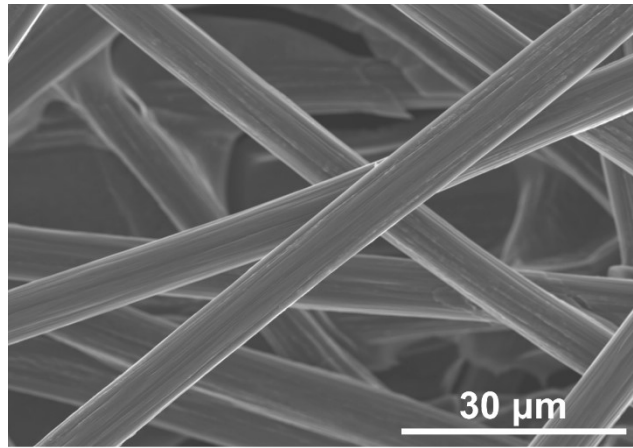

Fig. S2. Low-magnification SEM image of the bare CFP substrate.

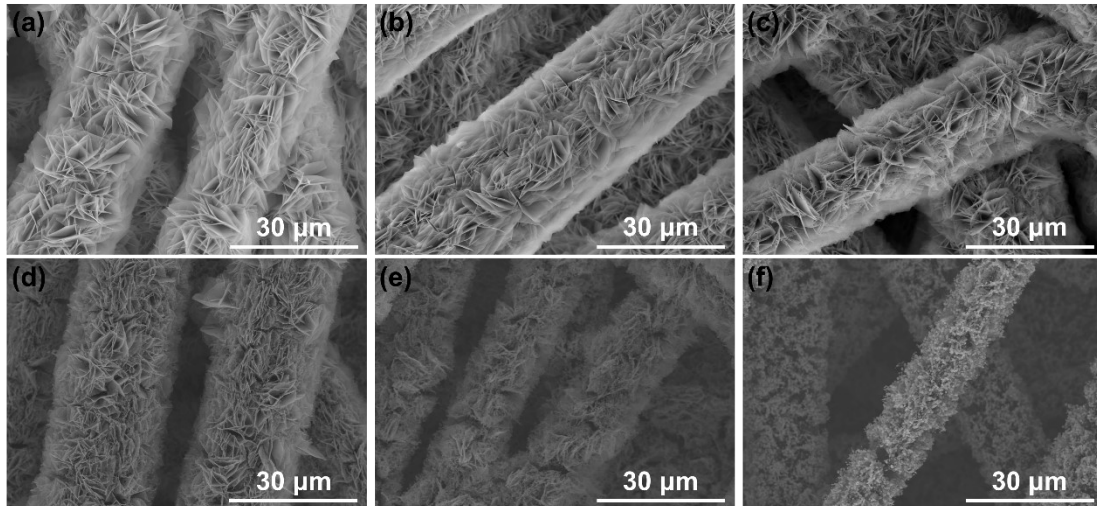

Fig. S3. Low-magnification SEM images of (a) NiO, (b) Ni@NiO-400, (c) Ni@NiO-500, (d) Ni@NiO-600V, (e) Ni@NiO-700 and (f) Ni@NiO-800 samples.

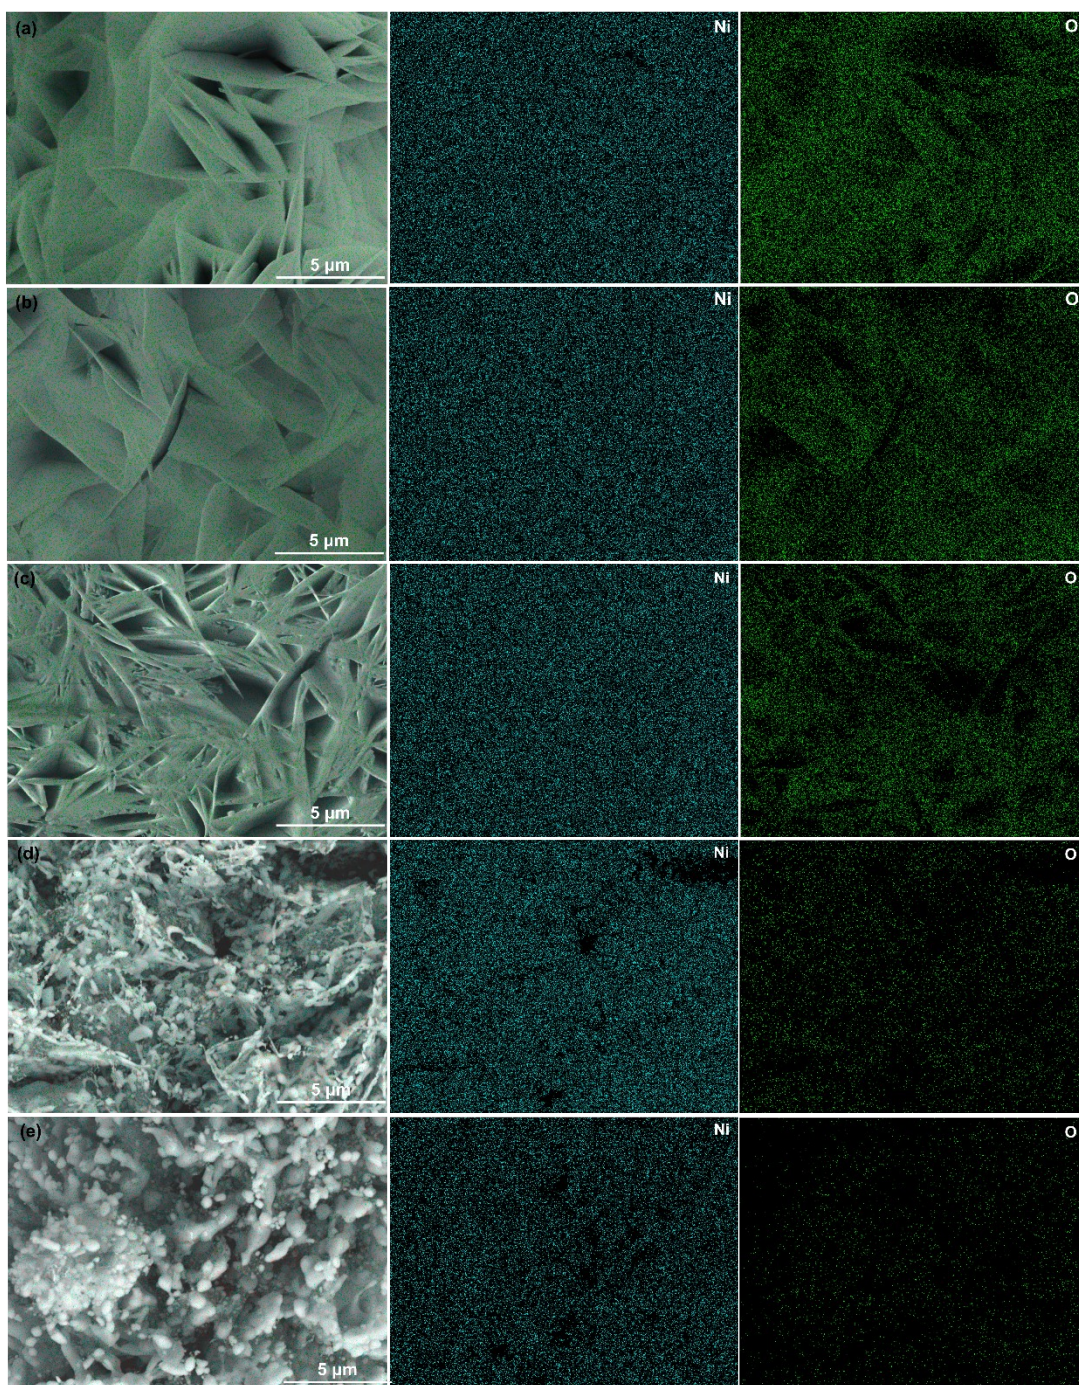

Fig. S4. EDX mapping of Ni and O in (a) NiO, (b) Ni@NiO-400, (c) Ni@NiO-500, (d) Ni@NiO-700 and (e) Ni@NiO-800 samples.

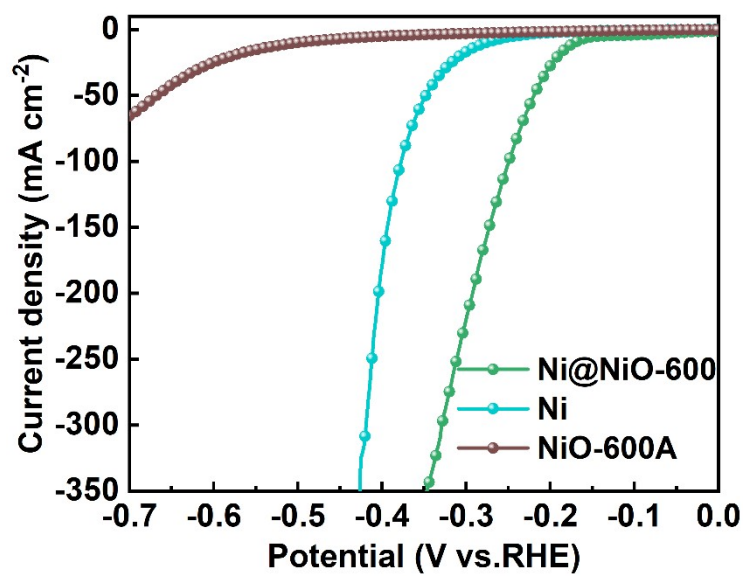

Fig. S5. LSVs of Ni, Ni@NiO-600, NiO-600A for HER in 1 M KOH.

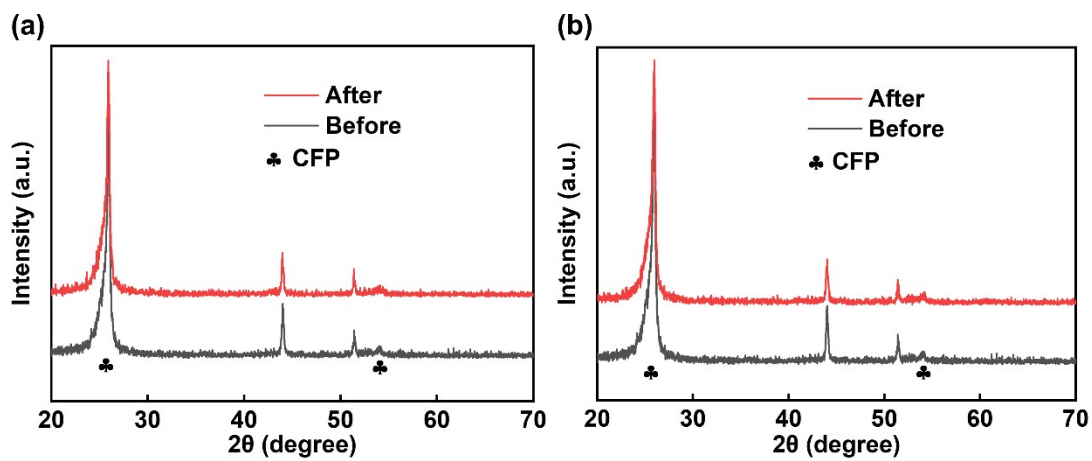

Fig. S6. XRD patterns before and after CV (a) and chronopotentiometry (b) tests for the Ni@NiO-600 sample.

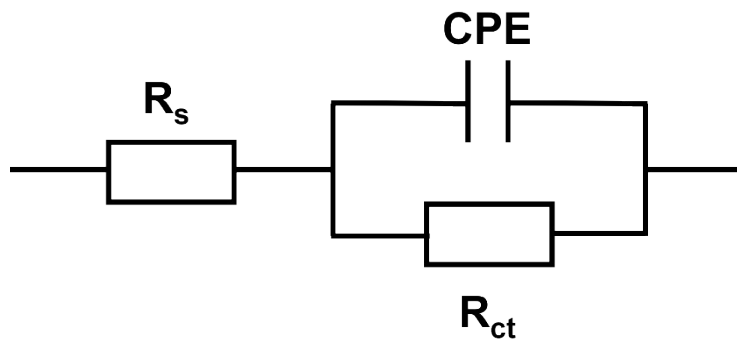

Fig. S7. The equivalent circuit diagram of the samples.



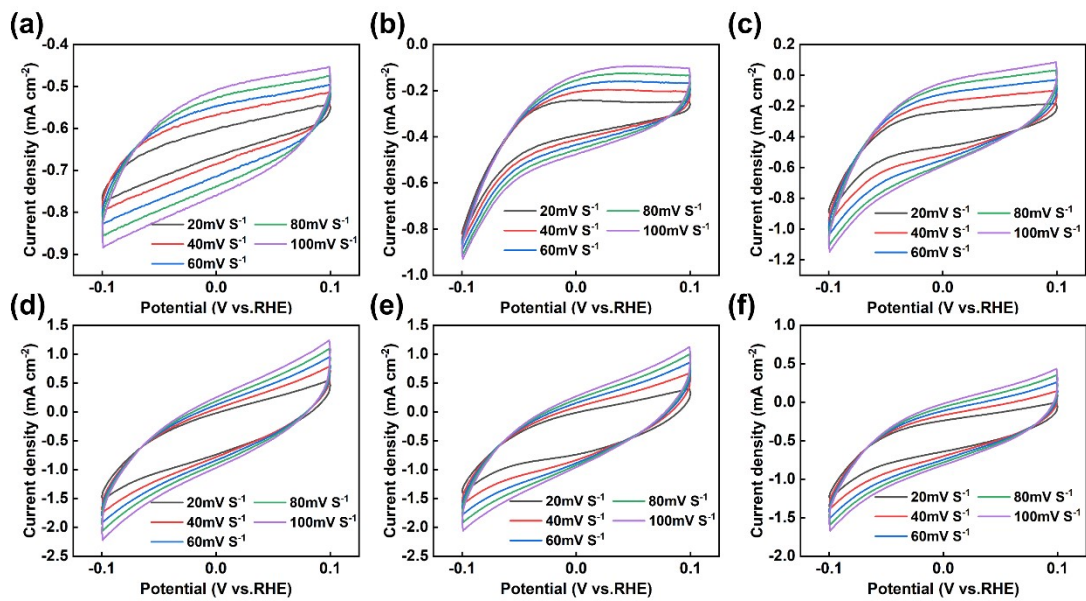

Fig. S8. Cyclic voltammograms collected in the region of -0.10 V to 0.10 V at various scan rates for the (a) NiO, (b) Ni@NiO-400, (c) Ni@NiO-500, (d) Ni@NiO-600, (e) Ni@NiO-700 and (f) Ni@NiO-800 samples.
